# Supplementary material for: S-Carboxymethyl Cysteine Protects against Oxidative Stress and Mitochondrial Impairment in a Parkinson’s Disease In Vitro Model
Source: MDPI journal article supplement (doi:10.3390/biomedicines9101467), 2021-10-14
Supplement: s1 [file s1]

## Supplementary Figures

**Dose response curve for 6-OHDA**

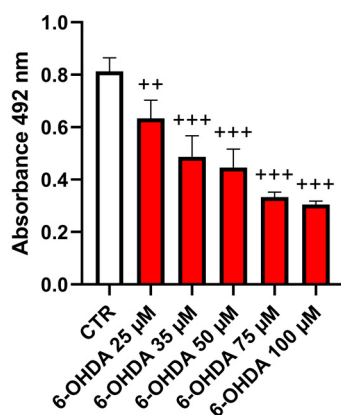

**Figure S1.** Dose response curve for 6-OHDA at different concentrations. ++p<0.005; +++p<0.0001 vs CTR.

**Dose response curve for SCMC**

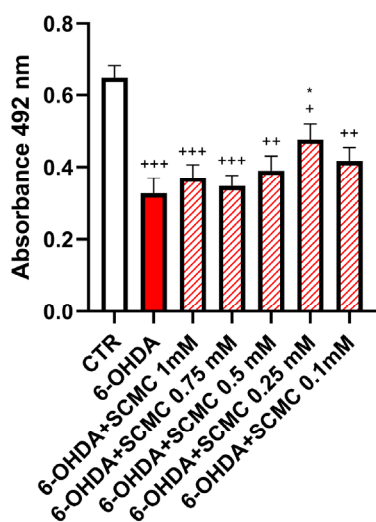

**Dose response curve for SCMC-O**

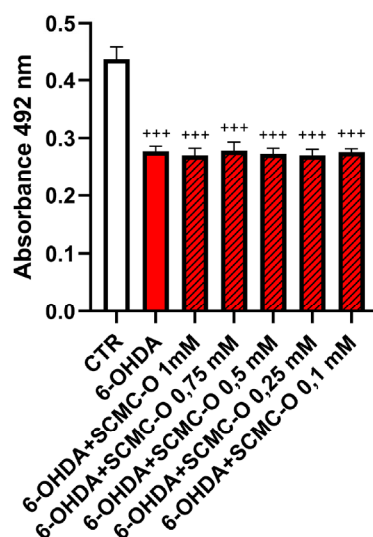

**Figure S2.** Dose response curve for SCMC and SCMC-O at different doses. \*p<0.04 vs 6-OHDA; ++p<0.005; +++p<0.0001 vs CTR.

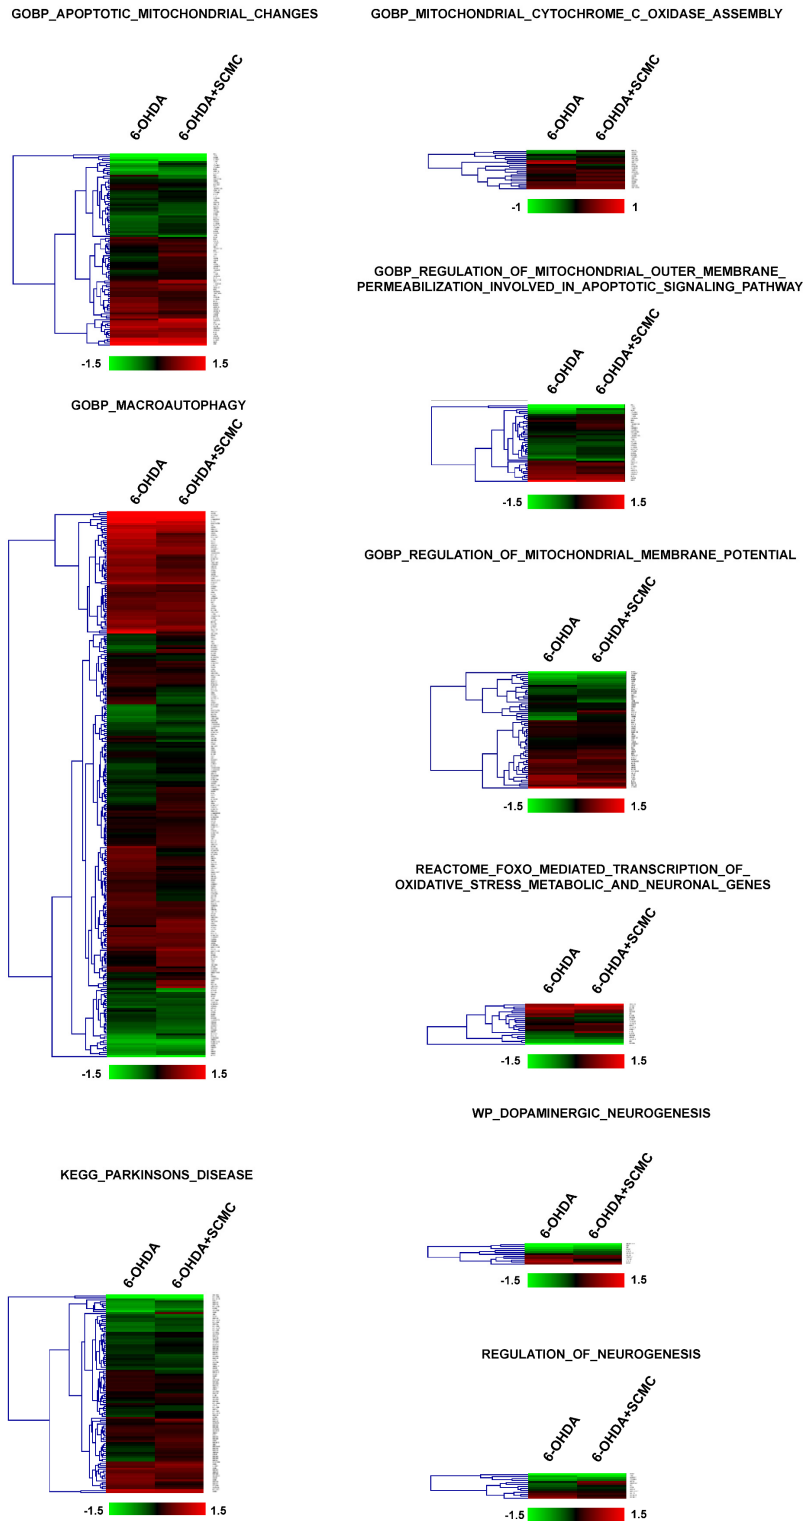

**Figure S3: Heatmap of hierarchical clustering of the selected pathways.** Color scale represents log<sub>2</sub> ratios of the expression levels in the indicated conditions vs CTR. Color scale limits are indicated in the boxes below the respective heatmap.

**Table S1.** Significance data relative to TMRM analyses (**Figure 8**) at different time points.
